# Supplementary material for: Prediction of high-temperature Chern insulator with half-metallic edge states in asymmetry-functionalized stanene
Source: Royal Society of Chemistry journal article supplement (doi:10.1039/c8nr07503d), 2018-01-01
Supplement: c8nr07503d1.pdf [file c8nr07503d1.pdf]

## **Supporting Information**

### Prediction of high-temperature Chern insulator with half-metallic edge states in asymmetry-functionalized stanene

Meng-han Zhang,<sup>1</sup> Chang-wen Zhang,<sup>1\*</sup> Pei-ji Wang<sup>1</sup>, and Sheng-shi Li<sup>2</sup>

<sup>1</sup> School of Physics and Technology, University of Jinan, Jinan, Shandong, 250022, People's Republic of China

<sup>2</sup> School of Physics, State Key laboratory of Crystal Materials, Shandong University, Jinan, Shandong 250100, People's Republic of China

**Corresponding Authors:**

\*E-mail: [ss\\_zhangchw@163.com](mailto:ss_zhangchw@163.com)

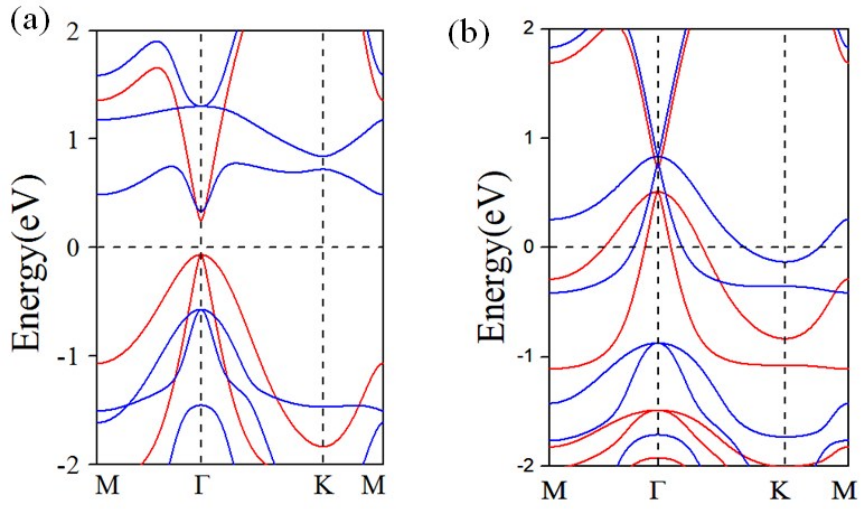

Fig. S1 Calculated Band structures of buckled configurations for (a) SnNH and (b) SnOH lattices without and with SOC, respectively. Also, the edge states for SnNH lattice are shown in (a).

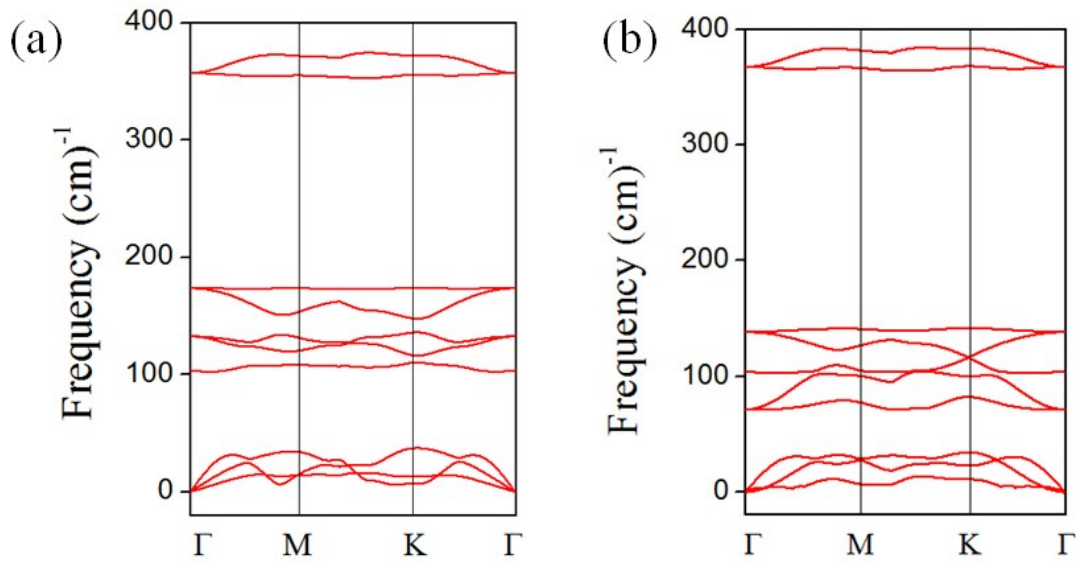

Fig. S2 The calculated phonon spectrum for buckled (a) SnNH and (b) SnOH, respectively.

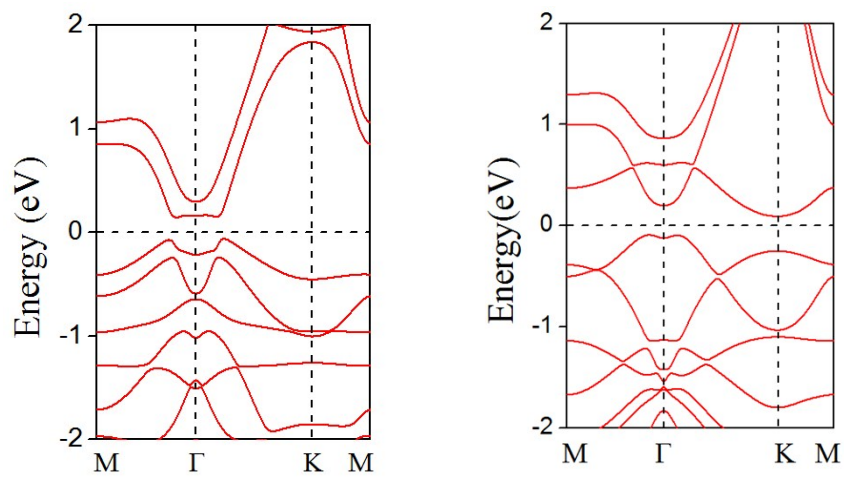

Fig. S3 Calculated HSE Band structures with SOC for (a) SnNH and (b) SnOH lattices, respectively.
